# Supplementary material for: Human-ecodynamics and the intertidal zones of the Zanzibar Archipelago
Source: Frontiers journal article supplement (doi:10.3389/feart.2022.982694), 2022-10-03
Supplement: Data_Sheet_4.xlsx [file Data_Sheet_4.xlsx]

## Sheet: Species Level Nestedness Matrix
	Site Code
Taxon	MFP	MVU	PLW	UU	FK	RM	KC1B	MMJ	KC2	KC3/4	KC1A
Polyplacophora
Anadara antiquata
Volema pyrum
Nerita albicilla
Gibberulus gibberulus
Lunella coronata
Terebralia palustris
Nerita polita
Atactodea striata
Nerita textilis
Cypraea tigris
Nerita plicata
Pleuroploca trapezium
Nerita undata
Nerita balteata
Chicoreus ramosus
Cerithium caeruleum
Monetaria annulus
Saccostrea cuccullata
Fasciolariidae
Vasum rhinoceros
Beguina gubernaculum
Septifer bilocularis
Quidnipagus palatam
Vasum turbinellus
Tucetona pectunculus
Tridacna maxima
Tectus pyramis
Clypeomorus bifasciata
Monetaria moneta
Monodonta labio
Loripes clausus
Vasticardium rubicundum
Mancinella armigera
Turbo setosus
Lambis lambis
Vasticardium pectiniforme
Vasum ceramicum
Modiolus auricularis
Arca ventricosa
Cerithium echinatum
Chama brassica
Diodora ruppellii
Chama limbula
Glycymeris queketti
Periglypta puerpera
Murex brevispina
Arca navicularis
Modiolus philippinarum
Maoricardium pseudolima
Cerithium nodulosum
Codakia punctata
Cerithium columna
Turbo marmoratus
Barbatia foliata
Isognomon ephippium
Barbatia trapezina
Asaphis violascens
Lentigo lentiginosus
Gafrarium pectinatum
Conomurex decorus
Canarium urceus
Nerita exuvia
Littoraria scabra
Sabia conica
Codakia tigerina
Conus marmoreus
Conus ebraeus
Littoraria coccinea glabrata
Conus flavidus
Reishia clavigera
Ctena bella
Lyncina vitellus
Thalessa virgata
Oliva bulbosa
Turbo argyrostomus
Erosaria helvola
Mimachlamys sanguinea
Tellinella virgata
Filifusus filamentosus
Littoraria undulata
Hyotissa hyotis
Nassarius gemmuliferus
Conus lividus
Donax faba
Gutturnium muricinum
Polinices mammilla
Nassarius coronatus
Harpago chiragra
Pinctada margaritifera
Nassarius arcularia
Nassarius echinatus
Monoplex nicobaricus
Latirus polygonus
Bulla ampulla
Perna perna
Lambis truncata
Planaxis sulcatus
Ovula ovum
Conus litteratus
Cypraecassis rufa
Cellana radiata
Anodontia edentula
Turbo bruneus
Stomatella auricula
Ranella gemmifera
Periglypta reticulata
Trapezium bicarinatum
Semele cordiformis
Glycymeris muskatensis
Gastrochaena cuneiformis
Chama reflexa
Chama pacifica
Fragum fragum
Barbatia amygdalumtostum
Rubritrochus declivis
Drupella margariticola
Tapes literatus
Ranularia gallinago
Monoplex parthenopeus
Conus miles
Conus litoglyphus
Pictocolumbella ocellata
Columbellidae
Venus sinuosa
Lioconcha castrensis
Lima lima
Cardita variegata
Pitar hebraeus
Timoclea subnodulosa
Lentigo pipus
Melicerona felina
Tectus fenestratus
Rochia virgata
Lambis crocata
Laevistrombus canarium
Conomurex luhuanus
Polinices spp.
Mancinella alouina
Drupa ricinus
Eoacmaea profunda
Nucleolaria nucleus
Lyncina lynx
Angaria delphinus
Cribrarula cribraria
Ranularia sarcostoma
Conus textile
Conus leopardus
Conus imperialis
Conus geographus
Conus bondarevi
Rhinoclavis kochi
Rhinoclavis aspera
Afrocominella capensis simoniana
Arca avellana
Pollia fumosa
Clementia papyracea
Oxystele tabularis
Monoplex gemmatus
Lotoria lotoria
Monetaria caputserpentis
Notocochlis gualteriana
Vasticardium kengaluorum
Oxymeris dimidiata
Mosambicarca erythraeonensis
Conus rattus
Semiricinula squamosa
Tapes sulcarius
Ergalatax heptagonalis
Tenguella granulata
Tylothais aculeata
Semiricinula konkanensis
Semele radiata
Atrina vexillum
Purpura persica
Cassis cornuta
Mactrotoma ovalina
Tellinella cruciata
Donax incarnatus
Gafrarium divaricatum
Meropesta nicobarica
Pinctada radiata
Drupella rugosa
Lunulicardia retusa auricula
Chicoreus torrefactus
Erosaria erosa
Cymatium cotorina
Bursa rosa
Limaria basilanica
Harpa harpa
Talparia talpa
Architectonica perspectiva
Solen cylindraceus
Monoplex pilearis
Tridacna squamosa
Hastula lanceata
Tonna variegata
Nassarius arcularia plicatus
Siphonaria carbo
Mactra cuneata
Drupa denticulata
Clypeomorus batillariaeformis
Barbatia decussata
Harpago arthriticus
Globivenus toreuma
Tritonoranella ranelloides
Pinna muricata
